# Supplementary material for: Peptide vaccine candidate mimics the heterogeneity of natural SARS-CoV-2 immunity in convalescent humans and induces broad T cell responses in mice models
Source: bioRxiv or medRxiv preprint supplement (doi:10.1101/2020.10.16.339937), 2020-10-16
Supplement: Supplementary file [file media-1.pdf]

## **Supplementary Tables and Figures**

**Somogyi et al: Peptide vaccine candidate mimics the heterogeneity of natural SARS-CoV-2 immunity in convalescent humans and induces broad T cell responses in mice models**

**Supplementary Table 1. Donor baseline and demographic information.** All donors were caucasoid, with mild/asymptomatic disease and no hospitalization (except one, marked with \*). S/Co, sample/control ratio; values were determined according to the manufacturer's instructions, and test results are interpreted as negative in S/Co <0.9, not conclusive if S/CO = 0.9–1.1, and positive if S/Co >1.1. COI, cut-off index; values were determined according to the manufacturer's instructions, and test results are interpreted as negative in COI <0.9, inconclusive with COI 0.9–1.1, and positive if COI >1.1. NA, data not available. *Italic, negative or inconclusive values.* \*\* Complaints: a, cough; b, sore throat; c, fever; d, short of breath; e, stomach/intestinal complaints; f, chest pain; g, sore eyes; h, odor or taste loss; i, headache; j, fatigue; k, other complaints (pulmonary embolism and cardiac arrest for IMXP00759; leg pain, arm pain, muscle pain, pain in the eyes).

| Donor ID   | Gender | Complaints from/ to:<br>(as reported by the donors) | Complaints**    | Blood collection date | Time from first symptom to blood collection | IgA          | IgM         | IgG    | IgG-S1    | IgG-N |
|------------|--------|-----------------------------------------------------|-----------------|-----------------------|---------------------------------------------|--------------|-------------|--------|-----------|-------|
|            |        |                                                     |                 |                       |                                             | DiaPro ELISA |             |        | EUROIMMUN | ROCHE |
|            |        |                                                     |                 |                       |                                             | S/Co         | S/Co        | S/Co   | S/Co      | COI   |
| IMXP00394  | Female | 30 March 2020 - 20 April 2020                       | a,b,c,d,h,i,j   | 4-Aug-20              | 126 days                                    | <i>0.36</i>  | 5.065       | 5.752  | 4,48      | 54.38 |
| IMXP00714  | Male   | 1 May 2020 – 15 May 2020                            | a,b,c,h,i,j,k   | 27-Jul-20             | 87 days                                     | 1.324        | 8.524       | 11.524 | 5,35      | 73.06 |
| IMXP00739  | Female | 30 April 2020                                       | j               | 2-Jun-20              | 63 days                                     | <i>0.929</i> | 8.841       | 11.967 | 4,54      | 77.61 |
| IMXP00756  | Female | 2 April 2020 - 12 April 2020                        | b,c,d,f,i,j     | 9-Jun-20              | 68 days                                     | <i>0.989</i> | 4.606       | 12.193 | 3,56      | 78.47 |
| IMXP00757  | Female | 29February 2020 - 14 April 2020                     | a,b,c,d,e,h,i,j | 9-Jun-20              | 101 days                                    | 1.154        | 5.847       | 8.701  | 7,62      | 29.47 |
| IMXP00758  | Female | 2 April 2020 - 30 arpril 2020                       | c,d,h,i,j       | 15-Jun-20             | 74 days                                     | 1.356        | 7.757       | 11.774 | 5,79      | 121.9 |
| IMXP00759* | Male   | 13 March 2020 - 28 March 2020                       | a,c,d,f,h,i,j,k | 15-Jun-20             | 94 days                                     | 6.307        | 10.666      | 13.838 | 9,27      | 87.09 |
| IMXP00762  | Female | 15 March 2020 – 19 March 2020                       | b,c,j           | 29-Jun-20             | 106 days                                    | 1.251        | 7.314       | 4.46   | 7,25      | 131.5 |
| IMXP00764  | Female | 16 March 2020 – 2 April 2020                        | a,b,e,h,i,j,k   | 6-Jul-20              | 115 days                                    | 5.161        | 9.739       | 11.677 | 1,32      | 46.59 |
| IMXP00765  | Female | 29 March 2020 - 15 May 2020                         | a,d,e,h,i,j,k   | 7-Jul-20              | 100 days                                    | <i>0.565</i> | 2.948       | 1.54   | 1,32      | 13.4  |
| IMXP00766  | Female | 20 June 2020 - 23 June 2020                         | b,c,h,j         | 7-Jul-20              | 17 days                                     | <i>0.771</i> | 4.648       | 3.973  | 4,14      | 6.25  |
| IMXP00767  | Female | 10 April 2020 - 10 May 2020                         | d,e,f,j,k       | 7-Jul-20              | 88 days                                     | <i>0.88</i>  | 5.402       | 3.459  | 2,37      | 52.29 |
| IMXP00771  | Female | 18 March 2020 – 1 April 2020                        | a,d,i,j         | 28-Jul-20             | 131 days                                    | <i>0.791</i> | 7.775       | 8.322  | 4,04      | 119.4 |
| IMXP00772  | Female | 30 March 2020 - 30 April 2020                       | g,k             | 28-Jul-20             | 120 days                                    | 1.105        | 4.256       | 2.54   | 1,26      | 10.87 |
| IMXP00776  | Female | 9 March 2020 - 14 March 2020                        | c,e,i,j,k       | 4-Aug-20              | 148 days                                    | <i>1.012</i> | 9.196       | 10.887 | 2,26      | 88.64 |
| PTC1       | Male   | 15 April 2020                                       | e               | 13-Jul-20             | 89 days                                     | <i>0.53</i>  | <i>0.41</i> | 2.63   | NA        | 18.96 |
| PTC2       | Female | 15 April 2020                                       | e               | 13-Jul-20             | 89 days                                     | <i>0.45</i>  | <i>0.35</i> | 1.49   | NA        | 26.09 |

**Supplementary Table 2. Sequence alignment results between PolyPEPI-SCoV-2 and other coronavirus strains.** Sequence comparison was made with 8-mer long peptide matching between the aligned protein sequence pairs, defined as the minimum length requirement for a CD8<sup>+</sup> T cell epitope. Max AA matching: the longest identical amino acid sequence length. Highlighted grey values represent identical sequences of at least eight amino acids.

| Target Protein | PolyPEPI-SCoV-2 vaccine peptide sequences |                                 | Common 8-mer % / Max AA matching |        |        |        |        |          |
|----------------|-------------------------------------------|---------------------------------|----------------------------------|--------|--------|--------|--------|----------|
|                |                                           |                                 | 229E                             | NL63   | OC43   | HKU1   | MERS   | SARS     |
| Spike          | S2                                        | GVYYDPKVFRRSSVLHSTQDLFLPFFSNVTW | 0% / 4                           | 0% / 4 | 0% / 4 | 0% / 3 | 0% / 3 | 4% / 8   |
|                | S5                                        | DSSSGWTAGAAAYVGYLQPRTFLLKYNN    | 0% / 3                           | 0% / 4 | 0% / 4 | 0% / 4 | 0% / 5 | 0% / 4   |
|                | S9                                        | ALQIPFAMQMAYRFNGIGVTQNVLYENQKL  | 0% / 4                           | 0% / 4 | 0% / 4 | 0% / 4 | 0% / 5 | 96% / 29 |
| Nucleoprotein  | N1                                        | RSKQRRPQGLPNNTASWFTALTQHGEDLK   | 0% / 3                           | 0% / 3 | 0% / 3 | 0% / 3 | 0% / 6 | 78% / 25 |
|                | N2                                        | SKKPRQKRTATKAYNVTQAFGRRGPEQTQG  | 0% / 4                           | 0% / 4 | 0% / 6 | 0% / 7 | 0% / 4 | 65% / 17 |
|                | N3                                        | ELIRQGTDYKHWPQIAQFAPSASAFFGMSR  | 0% / 3                           | 0% / 4 | 0% / 3 | 0% / 4 | 0% / 5 | 96% / 29 |
|                | N4                                        | QRQKKQQTVTLLPAADLDDFSKQLQSSMSS  | 0% / 5                           | 0% / 3 | 0% / 4 | 0% / 3 | 0% / 3 | 9% / 9   |
| Membrane       | M1                                        | LSYFIASFRLFARTRSMWSEFNPETNILLNV | 0% / 5                           | 0% / 6 | 4% / 8 | 4% / 8 | 4% / 8 | 78% / 25 |
| Envelope       | E1                                        | NIVNVSLVKPSFYVYSRVKLNLSRVPDLL   | 0% / 4                           | 0% / 4 | 0% / 3 | 0% / 5 | 0% / 4 | 35% / 12 |

**Supplementary Table 3. Response rate of COVID-19 convalescent donor patients to one, two, three, or all four viral antigens targeted by the PolyPEPI-SCoV-2 vaccine, as measured by *ex vivo* FluoroSpot assay.** Nine-mers are the hotspot HLA class I PEPIs embedded within each 30-mer vaccine peptide corresponding to the four structural proteins: S, Spike; N, Nucleoprotein; M, membrane; E, envelope proteins.

| Number of reactive antigens (S, N, M, E) | Percentage of subjects responsive to 30-mer peptides (N=17) | Percentage of subjects responsive to 9-mer peptides (N=17) |
|------------------------------------------|-------------------------------------------------------------|------------------------------------------------------------|
| 1                                        | 94%                                                         | 100%                                                       |
| 2                                        | 82%                                                         | 53%                                                        |
| 3                                        | 59%                                                         | 18%                                                        |
| 4                                        | 18%                                                         | 6%                                                         |

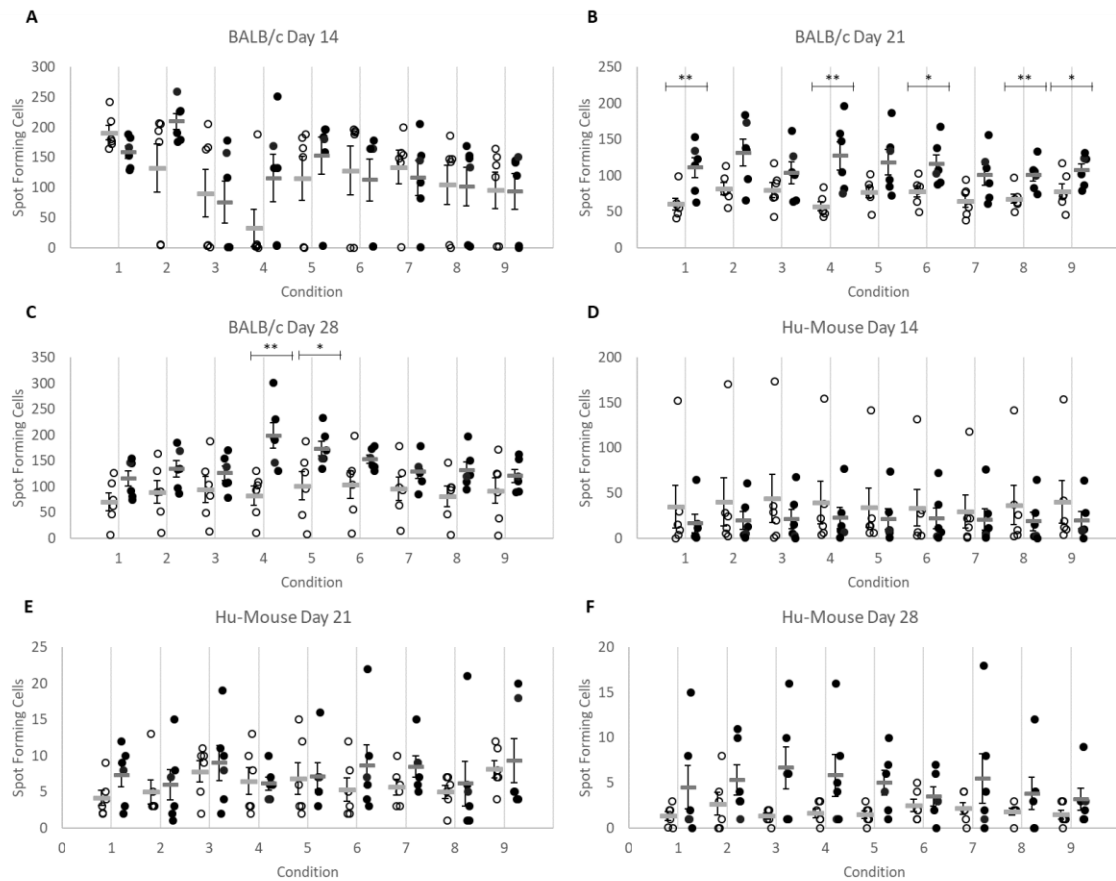

**Supplementary Figure 1. The PolyPEPI-SCoV-2 treatment increases IFN- $\gamma$ -producing T cells in mice.** PolyPEPI-SCoV-2 vaccinated mice are shown with black dots, and compared to Vehicle (DMSO/Water emulsified with Montanide) control animals shown in white dots. IFN- $\gamma$  production was analyzed by *ex vivo* ELISpot in the spleen after re-stimulation with peptides at day 14 (**A**, BALB/c; and **D**, Hu-mice), day 21 (**B**, BALB/c; and **E**, Hu-mice), and day 28 (**C**, BALB/c; and **F**, Hu-mice). Condition 1, S-pool; Spike-specific 30-mer pool of S2, S5, and S9 peptides. Condition 2, N-pool; Nucleoprotein-specific 30-mer pool of N1, N2, N3, and N4 peptides. Condition 3, M1 Membrane-specific 30-mer peptide. Condition 4, E1 Envelope-specific 30-mer peptide. Condition 5, S-pool; Spike-specific 9-mer pool of s2, s5, and s9 HLA class I PEPI hotspot fragment of the corresponding 30-mers. Condition 6, N-pool; Nucleoprotein-specific 9-mer pool of n1, n2, n3, and n4 HLA class I PEPI hotspot fragment of the corresponding 30-mers. Condition 7, m1 Membrane-specific 9-mer HLA class I PEPI hotspot fragment of the corresponding 30-mer. Condition 8, e1 Envelope-specific 9-mer HLA class I PEPI hotspot fragment of the corresponding 30-mer. Condition 9, unstimulated control. Individual spot forming cell (SFC) values and means are shown and represent spots per  $2 \times 10^5$  splenocytes.  $n=6$  mice per group were analyzed. Statistical analysis was performed by Mann-Whitney test. \*,  $p < 0.05$ ; \*\*,  $p < 0.01$ .

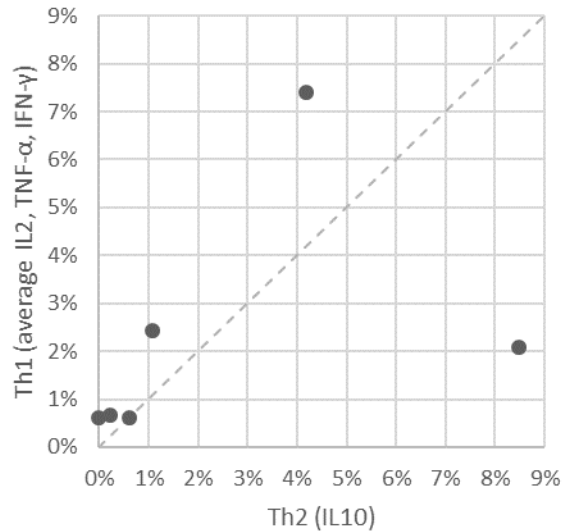

**Supplementary Figure 2. Th1/Th2 balance for T cells detected with PolyPEPI-SCoV-2 vaccine in BALB/c mice at day 28.** Average CD4<sup>+</sup> and CD8<sup>+</sup> T cells producing IL2, TNF- $\alpha$ , IFN- $\gamma$  (Th1 cytokines) and IL10 (Th2 cytokine) for each immunized mice (n=6) using ICS assay.  $2 \times 10^5$  cells were analyzed, gated for CD45<sup>+</sup> cells, CD3<sup>+</sup> T cells, CD4<sup>+</sup> or CD8<sup>+</sup> T cells. The average percent was obtained by pooling the background subtracted values of the 4 stimulation conditions (30-mer S-pool, N-pool, E1 and M1 peptides) for each cytokine for CD4<sup>+</sup> and CD8<sup>+</sup> T cells

A

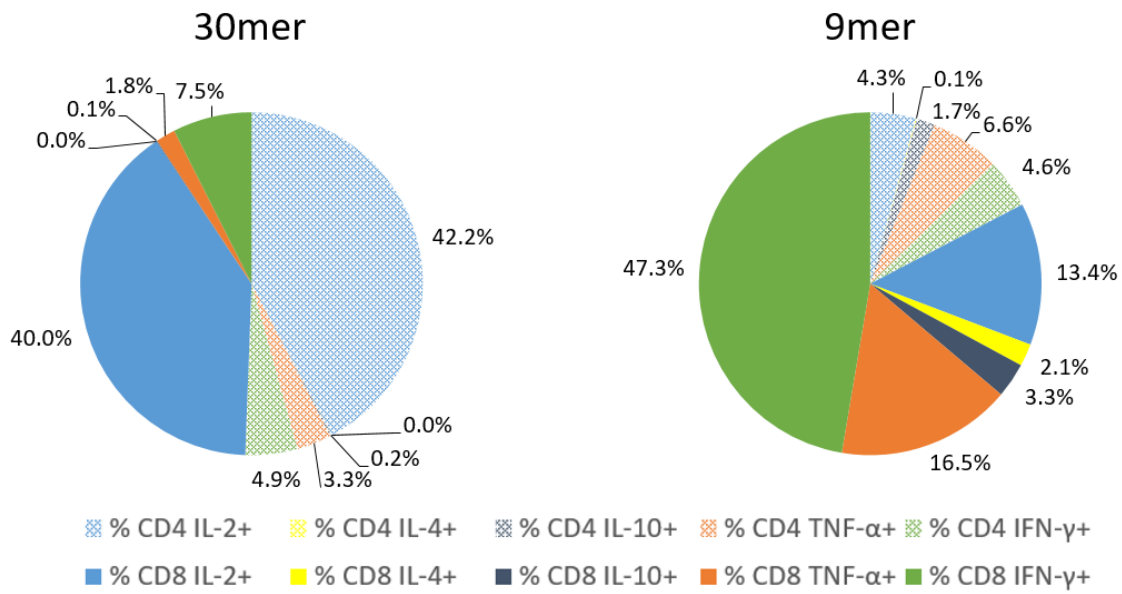

B

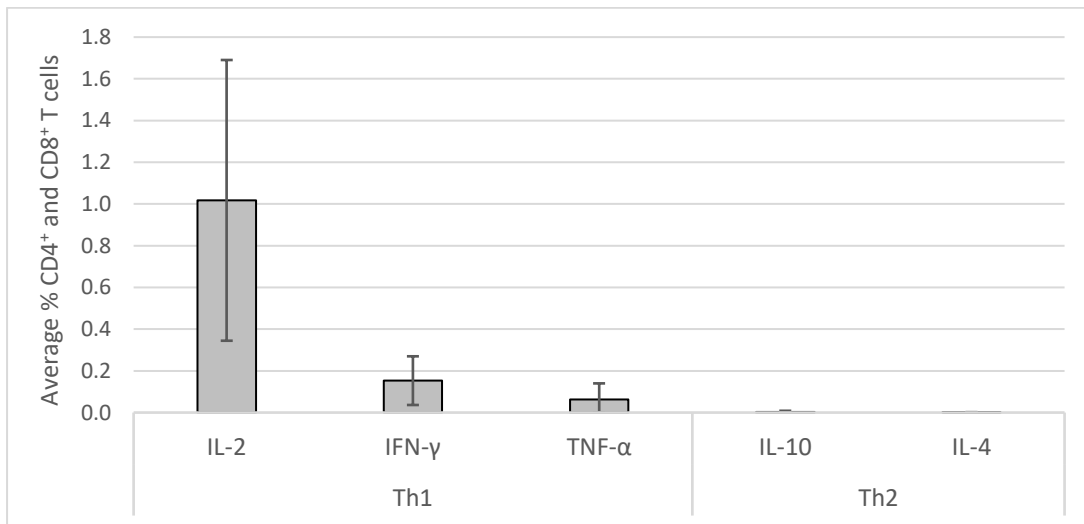

**Supplementary Figure 3. Cytokine production by COVID-19 convalescents' T cells reactive to PolyPEPI-SCoV-2 peptides determined *ex vivo* from their PBMC by intracellular staining assay. A) Cytokine profile of CD4<sup>+</sup> and CD8<sup>+</sup> T cells+ obtained by stimulations with 9-mer and 30-mer peptides (n=17). B) Th1 dominance in vaccine-specific T cells stimulated with 30-mer peptides.**

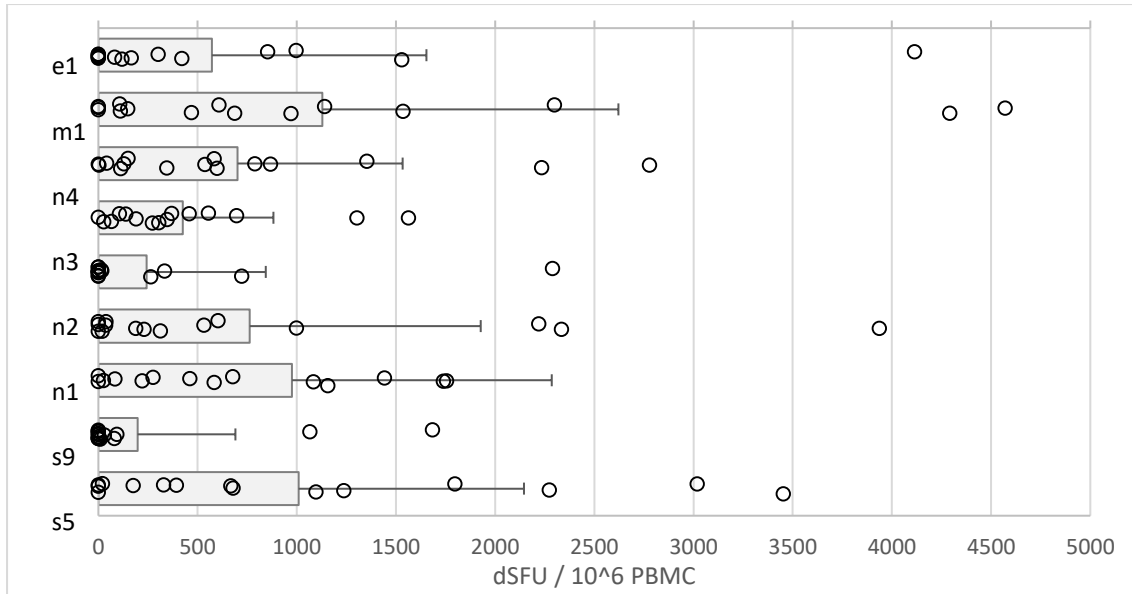

**Supplementary Figure 4. IFN- $\gamma$  + T cell responses detected for COVID-19 convalescent donors against the 9-mer peptides (PEPI hotspots) of PolyPEPI-SCoV-2 vaccine measured by enriched FluoroSpot assay.** s2, s5, and s9 are the three S-specific 9-mer peptide sequences derived from the Spike-specific vaccine 30-mers. n1–n4 are the four Nucleoprotein-specific 9-mer peptide sequences derived from the N-specific vaccine 30-mers. e1 and m1 are Envelope and Membrane-specific 9-mer peptide sequences derived from the E or M-specific vaccine 30-mers, respectively (Table 1 Bold). dSFU, delta spot forming units calculated as non-stimulated background corrected spot counts per  $10^6$  PBMC. Average and individual data for each subject are presented. PBMC, peripheral blood mononuclear cells.

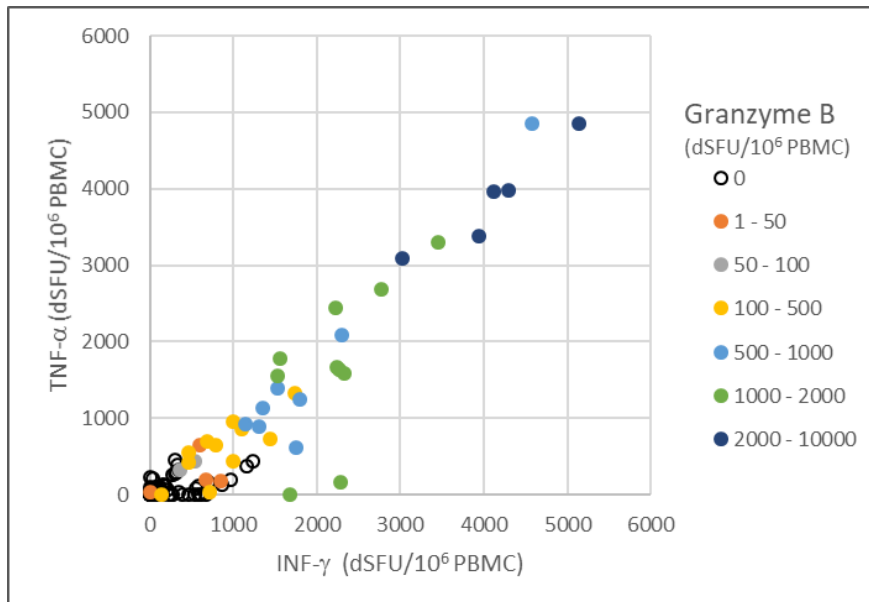

**Supplementary Figure 5. PolyPEPI-SCoV-2-specific polyfunctional T cells detected in COVID-19 convalescents' blood.** IFN- $\gamma$  and/or TNF- $\alpha$  and/or Granzyme-B positive T cell responses detected for each patient with individual 9-mer peptide stimulations using enriched FluoroSpot assay. dSFU stands for delta spot forming units, calculated as non-stimulated background corrected spot counts per  $10^6$  PBMC.

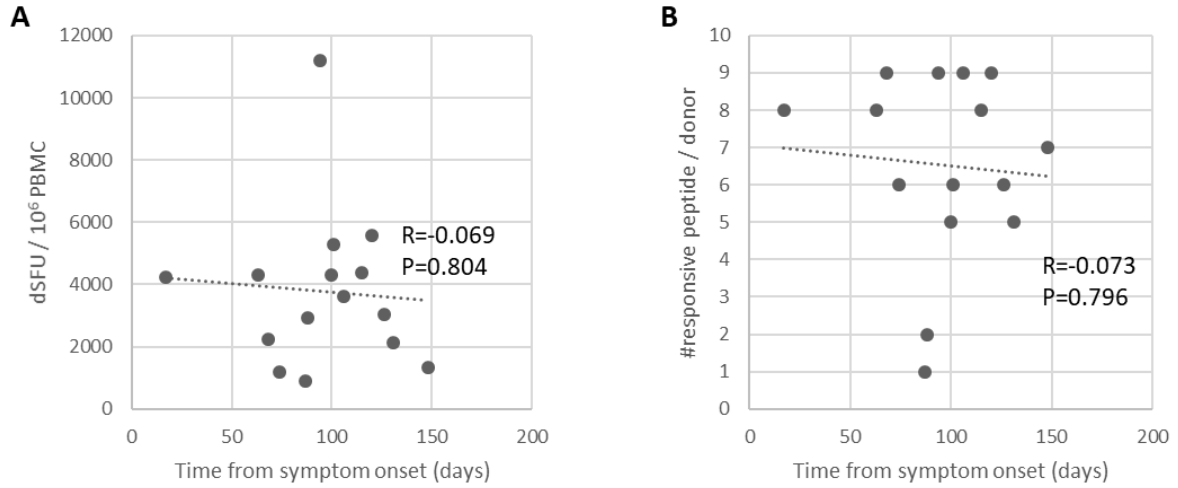

**Supplementary Figure 6. Magnitude and breadth of COVID-19 convalescent donors' T cell responses relative to time from symptom onset.** **A)** Magnitude of PolyPEPI-SCoV-2-reactive T cell responses **B)** Breadth of vaccine peptide-reactive CD8<sup>+</sup> T cell responses from convalescent donors, detected with enriched ELISpot assay. dSFU stands for delta spot forming units, calculated as non-stimulated background corrected spot counts per 10<sup>6</sup> PBMC. R- Pearson correlation coefficient.
